# Supplementary material
Source: publisher figshare collection journal article supplement (https://future-science-group.figshare.com/ndownloader/files/28067853)
Supplement: Supplementary file 1 [file 28067853]

Supplemental Table 1: Additional patient demographic and clinical characteristics

|  | NET Cohort | | Non-NET Cohort | | p-value3 |
| --- | --- | --- | --- | --- | --- |
| N = | 3,460 | N = | 10,370 |
|  |  |  |  |  |  |
| Geographic region (N, %)1 |  |  |  |  | <0.001 |
| Northeast | 888 | 26% | 2,193 | 21% |  |
| North Central | 926 | 27% | 2,803 | 27% |  |
| South | 1,275 | 37% | 3,925 | 38% |  |
| West | 364 | 11% | 1,430 | 14% |  |
| Unknown | 7 | 0% | 19 | 0% |  |
| Population density (N, %)1 |  |  |  |  | 0.277 |
| Urban | 2,974 | 86% | 9,005 | 87% |  |
| Rural | 479 | 14% | 1,352 | 13% |  |
| Unknown | 7 | 0% | 13 | 0% |  |
| Plan type (N, %)1 |  |  |  |  | 0.061 |
| Comprehensive/Indemnity | 658 | 19.0% | 1,985 | 19.1% |  |
| EPO/PPO | 1,749 | 50.5% | 4,989 | 48.1% |  |
| POS/POS with Capitation | 228 | 6.6% | 660 | 6.4% |  |
| HMO | 291 | 8.4% | 965 | 9.3% |  |
| CDHP/HDHP | 502 | 14.5% | 1,681 | 16.2% |  |
| Other/Unknown | 32 | 0.9% | 90 | 0.9% |  |
| Payer (N, %)1 |  |  |  |  | 0.108 |
| Commercial | 2,237 | 65% | 6,860 | 66% |  |
| Medicare supplemental | 1,223 | 35% | 3,510 | 34% |  |
| Provider type (N, %)2 |  |  |  |  |  |
| Gastroenterologist | 419 | 12.1% | NA | |  |
| Oncologist | 298 | 8.6% | NA | |  |
| Endocrinologist | 26 | 0.8% | NA | |  |
| Primary care | 762 | 22.0% | NA | |  |
| Other | 2,104 | 60.8% | NA | |  |

CDHP, consumer-driven health plan; EPO, exclusive provider organization; HDHP, high-deductible health plan; HMO, health maintenance organization; POS, point of service; PPO, preferred provider organization

1 Demographic characteristics were measured on index date.

2 Provider type is not mutually exclusive (patients may visit more than one provider type) and was measured on index date among NET patients.

3 The statistical test used was the chi-squared test for categorical measures.

4 SMD = standardized mean difference, defined as the absolute difference in means or proportions divided by the pooled standard deviation. A SMD of 0.20 is defined as a small difference between groups, 0.5 represents a medium effect size, and 0.80 represents a large effect size. SMD < 0.10 is usually considered reasonable for matching.
